# Supplementary material for: Economic evaluation of health promotion interventions for older people: do applied economic studies meet the methodological challenges?
Source: Springer Nature journal article supplement (doi:10.1186/s12962-018-0100-4), 2018-04-16
Supplement: MOESM1 [file 15703478]

| Table S1.<br>Tabular summary of results      |                                        | Results of the assessment of the four criteria specific for interventions targeting older people |                                                                    |                                                         |                                          | General characteristics of the studies,<br>Results of the general quality assessment |                           |                             |                                           |
|----------------------------------------------|----------------------------------------|--------------------------------------------------------------------------------------------------|--------------------------------------------------------------------|---------------------------------------------------------|------------------------------------------|--------------------------------------------------------------------------------------|---------------------------|-----------------------------|-------------------------------------------|
| No                                           | Criteria<br>Study                      | Consideration of informal caregiving <sup>3</sup>                                                | Consideration of productivity costs/<br>unpaid labour <sup>4</sup> | Consideration of costs related to the life years gained | Consideration of 'Beyond-health' effects | Societal perspective                                                                 | Health Problem            | Type of economic evaluation | General quality of the study <sup>5</sup> |
| <b>Studies included in Dubas et al. 2017</b> |                                        |                                                                                                  |                                                                    |                                                         |                                          |                                                                                      |                           |                             |                                           |
| 1                                            | Carande-Kulis et al. 2015 [31]         | N/A                                                                                              | N/A                                                                | NO                                                      | NO                                       | NO                                                                                   | Falls                     | CBA                         | moderate                                  |
| 2                                            | Church et al. 2011 [32]                | N/A                                                                                              | N/A                                                                | NO                                                      | NO                                       | NO                                                                                   | Falls                     | CEA, CUA                    | moderate                                  |
| 3                                            | Church et al. 2012 [33]                | N/A                                                                                              | N/A                                                                | NO                                                      | NO                                       | NO                                                                                   | Falls                     | CEA, CUA                    | poor                                      |
| 4                                            | Davis et al. 2011 [34]                 | N/A                                                                                              | N/A                                                                | NO                                                      | NO                                       | NO                                                                                   | Falls                     | CEA, CUA                    | good                                      |
| 5                                            | Farag et al. 2015 [35]                 | N/A                                                                                              | N/A                                                                | NO                                                      | NO                                       | NO                                                                                   | Falls                     | CUA                         | moderate                                  |
| 6                                            | Frenkel et al. 2001 [67]               | N/A                                                                                              | N/A                                                                | NO                                                      | NO                                       | NO                                                                                   | Oral health               | CCA                         | moderate                                  |
| 7                                            | Frick et al. 2010 [36]                 | N/A                                                                                              | N/A                                                                | NO                                                      | NO                                       | NO                                                                                   | Falls                     | CUA                         | moderate                                  |
| 8                                            | Groessler et al. 2009 [56]             | N/A                                                                                              | N/A                                                                | NO                                                      | NO                                       | NO                                                                                   | General disability        | CEA                         | moderate                                  |
| 9                                            | Haas 2006 [37]                         | N/A                                                                                              | N/A                                                                | NO                                                      | NO                                       | NO                                                                                   | Falls                     | CEA                         | moderate                                  |
| 10                                           | Heinrich et al. 2013 [38]              | N/A                                                                                              | N/A                                                                | NO                                                      | NO                                       | NO                                                                                   | Falls                     | CEA                         | moderate                                  |
| 11                                           | Hektoen et al. 2009 [39]               | N/A                                                                                              | N/A                                                                | NO                                                      | NO                                       | NO                                                                                   | Falls                     | CEA                         | good                                      |
| 12                                           | Medical Advisory Secretariat 2008 [40] | N/A                                                                                              | N/A                                                                | NO                                                      | NO                                       | NO                                                                                   | Falls                     | CEA                         | moderate                                  |
| 13                                           | Irvine et al. 2010 [41]                | N/A                                                                                              | N/A                                                                | NO                                                      | NO                                       | NO                                                                                   | Falls                     | CEA                         | good                                      |
| 14                                           | Kenkre et al. 2002 [42]                | N/A                                                                                              | N/A                                                                | NO                                                      | NO                                       | NO                                                                                   | Falls                     | CCA                         | poor                                      |
| 15                                           | Munro et al. 2004 [61]                 | N/A                                                                                              | N/A                                                                | NO                                                      | NO                                       | NO                                                                                   | General health status     | CEA, CUA                    | moderate                                  |
| 16                                           | Day et al. 2009 [43]                   | NO                                                                                               | NO                                                                 | NO                                                      | NO <sup>2</sup>                          | UNCLEAR                                                                              | Falls                     | CEA                         | moderate                                  |
| 17                                           | Ling et al. 2008 [44]                  | NO                                                                                               | NO                                                                 | NO                                                      | NO <sup>2</sup>                          | UNCLEAR                                                                              | Falls                     | CBA                         | poor                                      |
| 18                                           | Chen et al. 2008 [57]                  | (YES) <sup>1</sup>                                                                               | YES/(YES) <sup>1</sup>                                             | NO                                                      | NO                                       | YES                                                                                  | General disability        | CEA, CUA                    | poor                                      |
| 19                                           | Hendriks et al. 2008 [45]              | YES                                                                                              | NO                                                                 | NO                                                      | NO                                       | YES                                                                                  | Falls                     | CEA, CUA                    | good                                      |
| 20                                           | Iliffe et al. 2014 [63]                | NO                                                                                               | YES/YES                                                            | NO                                                      | (YES) <sup>1</sup>                       | YES                                                                                  | Lack of physical activity | CEA, CUA                    | good                                      |
| 21                                           | Jenkyn et al. 2012 [46]                | YES                                                                                              | YES/UNCLEAR                                                        | NO                                                      | NO                                       | YES                                                                                  | Falls                     | CEA                         | good                                      |
| 22                                           | Johansson et al. 2008 [47]             | YES                                                                                              | YES/NO                                                             | NO                                                      | NO <sup>2</sup>                          | YES                                                                                  | Falls                     | CEA, CUA                    | good                                      |
| 23                                           | Kronborg et al. 2006 [58]              | NO <sup>2</sup>                                                                                  | NO                                                                 | NO                                                      | NO                                       | YES                                                                                  | General disability        | CEA                         | good                                      |
| 24                                           | Robertson et al. 2001a [48]            | NO                                                                                               | NO                                                                 | NO                                                      | NO                                       | YES                                                                                  | Falls                     | CEA                         | moderate                                  |
| 25                                           | Robertson et al. 2001b [49]            | NO                                                                                               | NO                                                                 | NO                                                      | NO                                       | YES                                                                                  | Falls                     | CEA                         | good                                      |
| 26                                           | Robertson et al. 2001c [50]            | NO                                                                                               | NO                                                                 | NO                                                      | NO                                       | YES                                                                                  | Falls                     | CEA                         | moderate                                  |
| 27                                           | Sahlen et al. 2008 [62]                | NO                                                                                               | NO <sup>2</sup>                                                    | YES                                                     | NO <sup>2</sup>                          | YES                                                                                  | General health status     | CUA                         | good                                      |
| 28                                           | Salked et al. 2000 [51]                | YES                                                                                              | NO                                                                 | NO                                                      | NO                                       | YES                                                                                  | Falls                     | CEA                         | moderate                                  |
| 29                                           | Wilson & Datta 2001 [52]               | N/A                                                                                              | UNCLEAR                                                            | NO                                                      | UNCLEAR                                  | YES                                                                                  | Falls                     | CBA                         | good                                      |

| Table S1.<br>Tabular summary of results                              |                                 | Results of the assessment of the four criteria specific for interventions targeting older people |                                                                 |                                                         |                                          | General characteristics of the studies,<br>Results of the general quality assessment |                           |                             |                                           |
|----------------------------------------------------------------------|---------------------------------|--------------------------------------------------------------------------------------------------|-----------------------------------------------------------------|---------------------------------------------------------|------------------------------------------|--------------------------------------------------------------------------------------|---------------------------|-----------------------------|-------------------------------------------|
| No                                                                   | Criteria<br>Study               | Consideration of informal caregiving <sup>3</sup>                                                | Consideration of productivity costs/ unpaid labour <sup>4</sup> | Consideration of costs related to the life years gained | Consideration of 'Beyond-health' effects | Societal perspective                                                                 | Health Problem            | Type of economic evaluation | General quality of the study <sup>5</sup> |
| <b>Studies included based on the update of the literature search</b> |                                 |                                                                                                  |                                                                 |                                                         |                                          |                                                                                      |                           |                             |                                           |
| 30                                                                   | Cowper et al. 2017 [64]         | N/A                                                                                              | N/A                                                             | NO                                                      | NO                                       | NO                                                                                   | Lack of physical activity | CEA                         | good                                      |
| 31                                                                   | Groessler et al. 2016 [59]      | N/A                                                                                              | N/A                                                             | NO                                                      | NO                                       | NO                                                                                   | Mobility disability       | CEA/CUA                     | good                                      |
| 32                                                                   | Karnon et al. 2017 [65]         | N/A                                                                                              | N/A                                                             | YES                                                     | NO                                       | NO                                                                                   | Frailty                   | CUA                         | good                                      |
| 33                                                                   | McLean et al. 2015 [53]         | N/A                                                                                              | N/A                                                             | NO                                                      | NO                                       | NO                                                                                   | Falls                     | CEA, CUA                    | good                                      |
| 34                                                                   | Mountain et al. 2017 [66]       | N/A                                                                                              | N/A                                                             | NO                                                      | (YES) <sup>1</sup>                       | NO                                                                                   | Mental well-being         | CEA, CUA                    | good                                      |
| 35                                                                   | Mueller et al. 2015 [54]        | N/A                                                                                              | N/A                                                             | NO                                                      | NO                                       | NO                                                                                   | Fall-related fractures    | CUA                         | good                                      |
| 36                                                                   | Suijker et al. 2017 [60]        | N/A <sup>2</sup>                                                                                 | N/A <sup>2</sup>                                                | NO                                                      | NO                                       | NO <sup>2</sup>                                                                      | General disabilities      | CEA, CUA                    | good                                      |
| 37                                                                   | Isaranuwatthai et al. 2017 [55] | NO                                                                                               | NO                                                              | NO                                                      | NO                                       | YES                                                                                  | Falls                     | CEA                         | moderate                                  |

**Abbreviations:** CEA: Cost effectiveness analysis; CUA: Cost utility analysis; CBA: Cost benefit analysis; CCA: Cost consequence analysis

<sup>1</sup> partially included

<sup>2</sup> mentioned as a part of the study limitation or justification for exclusion provided (e.g. lack of data for calculation)

<sup>3</sup> In the case of the studies with an applied perspective other than societal the criteria concerning informal caregiver time and productivity costs are in fact not applicable (N/A).

<sup>4</sup> If productivity costs, respectively a valuation of the participants' time is included, the second statement indicates whether unpaid labour is considered.

<sup>5</sup> Quality of the study as defined and assessed by Dubas-Jakóbczyk K, Kocot E, Kissimova-Skarbek K, Huter K, Rothgang H. Economic evaluation of health promotion and primary prevention actions for older people - a systematic review. Eur J Public Health. 2017; doi: 10.1093/eurpub/ckx030.
